# Supplementary material
Source: ML conference proceedings conference paper supplement (https://proceedings.mlr.press/v108/sterge20a.html)
Supplement: Supplementary file [file sterge20a-supp.pdf]

## A Supplementary Results

### A.1 Proof of Lemma 1

*Proof.* Note that

$$R(P) = \mathbb{E} \|(I - P)k(\cdot, X)\|_{\mathcal{H}}^2 = \mathbb{E} \langle (I - P)k(\cdot, X), (I - P)k(\cdot, X) \rangle_{\mathcal{H}},$$

which in turn is equivalent to

$$\mathbb{E} \langle (I - P)k(\cdot, X), k(\cdot, X) \rangle_{\mathcal{H}} = \mathbb{E} \langle (I - P), k(\cdot, X) \otimes_{\mathcal{H}} k(\cdot, X) \rangle_{\mathcal{L}^2(\mathcal{H})},$$

where we used  $\langle Bf, g \rangle_{\mathcal{H}} = \langle B, f \otimes_{\mathcal{H}} g \rangle_{\mathcal{L}^2(\mathcal{H})}$  and  $(I - P)^2 = (I - P)$  in the above equivalence. Since  $k$  is bounded, it follows that

$$\mathbb{E} \langle (I - P), k(\cdot, X) \otimes_{\mathcal{H}} k(\cdot, X) \rangle_{\mathcal{L}^2(\mathcal{H})} = \langle (I - P), \mathbb{E}[k(\cdot, X) \otimes_{\mathcal{H}} k(\cdot, X)] \rangle_{\mathcal{L}^2(\mathcal{H})}.$$

The result follows by using the above in  $R(P)$  and noting that

$$\langle (I - P), C \rangle_{\mathcal{L}^2(\mathcal{H})} = \text{tr}((I - P)C) = \text{tr}\left(C^{1/2}(I - P)(I - P)C^{1/2}\right) = \left\| (I - P)C^{1/2} \right\|_{\mathcal{L}^2(\mathcal{H})}^2,$$

where we have used the invariance of trace under cyclic permutations.  $\square$

**Lemma A.1.** *For  $\delta > 0$ , suppose  $\frac{9\kappa}{n} \log \frac{n}{\delta} \leq t \leq \lambda_1$ . Then the following hold:*

- (i)  $\mathbb{P}^n \left\{ \sqrt{\frac{2}{3}} \leq \|(C + tI)^{1/2}(C_n + tI)^{-1/2}\|_{\mathcal{L}^\infty(\mathcal{H})} \leq \sqrt{2} \right\} \geq 1 - \delta;$
- (ii)  $\mathbb{P}^n \left\{ \|(C + tI)^{-1/2}(C_n + tI)^{1/2}\|_{\mathcal{L}^\infty(\mathcal{H})} \leq \sqrt{\frac{3}{2}} \right\} \geq 1 - \delta;$
- (iii)  $\mathbb{P}^n \left\{ \hat{\lambda}_\ell + t \leq \frac{3}{2}(\lambda_\ell + t) \right\} \geq 1 - \delta.$
- (iv)  $\mathbb{P}^n \left\{ \lambda_\ell + t \leq 2(\hat{\lambda}_\ell + t) \right\} \geq 1 - \delta.$

*Proof.* (i) The result is quoted from Lemma 3.6 of (Rudi et al., 2013) with  $\alpha = \frac{1}{2}$ .

(ii) This is a slight variation of (i) and the proof idea follows that of Lemma 3.6 of (Rudi et al., 2013) with  $\alpha = \frac{1}{2}$ . Note that

$$\left\| (C + tI)^{-1/2}(C_n + tI)^{1/2} \right\|_{\mathcal{L}^\infty(\mathcal{H})} = \left\| (C + tI)^{-1/2}(C_n + tI)(C + tI)^{-1/2} \right\|_{\mathcal{L}^\infty(\mathcal{H})}^{1/2}.$$

By defining  $B_n = (C + tI)^{-1/2}(C - C_n)(C + tI)^{-1/2}$ , we have

$$I - B_n = (C + tI)^{-1/2}((C + tI) - C + C_n)(C + tI)^{-1/2} = (C + tI)^{-1/2}(C_n + tI)(C + tI)^{-1/2}$$

and therefore

$$\left\| (C + tI)^{-1/2}(C_n + tI)^{1/2} \right\|_{\mathcal{L}^\infty(\mathcal{H})} = \|I - B_n\|_{\mathcal{L}^\infty(\mathcal{H})}^{1/2} \leq \left(1 + \|B_n\|_{\mathcal{L}^\infty(\mathcal{H})}\right)^{1/2}. \quad (18)$$

It follows from the proof of Lemma 3.6 of (Rudi et al., 2013) that for  $\frac{9\kappa}{n} \log \frac{n}{\delta} \leq t$ ,

$$\mathbb{P}^n \left\{ \|B_n\|_{\mathcal{L}^\infty(\mathcal{H})} \leq \frac{1}{2} \right\} \geq 1 - \delta. \quad (19)$$

Combining (18) and (19) completes the proof.

(iii) Since  $\sqrt{\frac{2}{3}} \leq \|(C + tI)^{1/2}(C_n + tI)^{-1/2}\|_{\mathcal{L}^\infty(\mathcal{H})}$  as obtained in (i), it is equivalent (see (Rudi et al., 2013, Lemmas B.2 and 3.5)) to  $C_n + tI \preceq \frac{3}{2}(C + tI)$ . This implies (see Gohberg et al., 2003) that  $\hat{\lambda}_k + t \leq \frac{3}{2}(\lambda_k + t)$  for all  $k \geq 1$ . (iv) follows similarly.  $\square$

**Lemma A.2** (Rudi et al. (2015), Lemma 6). *Suppose Assumption 1 holds, and suppose for some  $m < n$ , the set  $\{\tilde{X}_j\}_{j=1}^m$  is drawn uniformly from the set of all partitions of size  $m$  of the training data,  $\{X_i\}_{i=1}^n$ . For  $t > 0$  and any  $\delta > 0$  such that  $m \geq (67 \vee 5\mathcal{N}_{C,\infty}(t)) \log \frac{4\kappa}{t\delta}$ , we have*

$$\mathbb{P}^n \left\{ \left\| (I - P_m)(C + tI)^{1/2} \right\|_{\mathcal{L}^\infty(\mathcal{H})}^2 \leq 3t \right\} \geq 1 - \delta,$$

where  $P_m$  is the orthogonal projector onto  $\mathcal{H}_m = \text{span}\{k(\cdot, \tilde{X}_j) | j \in [m]\}$ .

**Lemma A.3** (Rudi et al. (2015), Lemma 7). *Suppose Assumption 1 holds. Let  $(\hat{l}_i(s))_{i=1}^n$  be the collection of approximate leverage scores. Letting  $N := \{1, \dots, n\}$ , for  $t > 0$  define  $p_t$  as the distribution over  $N$  with probabilities  $p_t(i) = \hat{l}_i(t) / \sum_{j=1}^n \hat{l}_j(t)$ . Let  $\mathcal{I}_m = \{i_1, \dots, i_m\} \subset N$  be a collection of indices independently sampled from  $p_t$  with replacement. Let  $P_m$  be the orthogonal projector onto  $\mathcal{H}_m = \text{span}\{k(\cdot, \tilde{X}_j) | j \in \mathcal{I}_m\}$ . Additionally, for any  $\delta > 0$ , suppose the following hold:*

1. *There exists  $T \geq 1$  and  $t_0 > 0$  such that for any  $s \geq t_0$ ,  $(\hat{l}_i(s))_{i=1}^n$  are  $T$ -approximate leverage scores with confidence  $\delta$ ,*
2.  $n \geq 1655\kappa + 223\kappa \log \frac{2\kappa}{\delta}$ ,
3.  $t_0 \vee \frac{19\kappa}{n} \log \frac{2n}{\delta} \leq t \leq \lambda_1$ ,
4.  $m \geq 334 \log \frac{8n}{\delta} \vee 78T^2 \mathcal{N}_C(t) \log \frac{8n}{\delta}$ .

Then

$$\mathbb{P}^n \left\{ \left\| (I - P_m)(C + tI)^{1/2} \right\|_{\mathcal{L}^\infty(\mathcal{H})}^2 \leq 3t \right\} \geq 1 - 2\delta.$$

## B Technical Results

**Proposition B.1.** *Suppose  $\underline{A}i^{-\alpha} \leq \lambda_i \leq \bar{A}i^{-\alpha}$  for  $\alpha > 1$  and  $\underline{A}, \bar{A} \in (0, \infty)$ . The following holds:*

$$\mathcal{N}_C(t) \lesssim t^{-1/\alpha}.$$

*Proof.* We have

$$\mathcal{N}_C(t) = \text{tr}((C + tI)^{-1}C) = \sum_{i \geq 1} \frac{\lambda_i}{\lambda_i + t} \leq \sum_{i \geq 1} \frac{\bar{A}i^{-\alpha}}{\underline{A}i^{-\alpha} + t} = \frac{\bar{A}}{\underline{A}} \sum_{i \geq 1} \frac{i^{-\alpha}}{i^{-\alpha} + t\underline{A}^{-1}}.$$

Let  $u = t^{1/\alpha} \underline{A}^{-1/\alpha} x \implies u^\alpha = t\underline{A}^{-1} x^\alpha$  and  $dx = t^{-1/\alpha} \underline{A}^{1/\alpha} du$ . Therefore,

$$\sum_{i \geq 1} \frac{i^{-\alpha}}{i^{-\alpha} + t\underline{A}^{-1}} \leq \int_0^\infty \frac{x^{-\alpha}}{x^{-\alpha} + t\underline{A}^{-1}} dx = \int_0^\infty \frac{1}{1 + t\underline{A}^{-1} x^\alpha} dx = \left(\frac{\underline{A}}{t}\right)^{1/\alpha} \int_0^\infty \frac{1}{1 + u^\alpha} du.$$

Since  $\frac{1}{1+u^\alpha}$  is decreasing in  $\alpha$  on  $u \in (0, \infty)$ , we have

$$\frac{1}{1+u^\alpha} \leq \frac{1}{1+u^2}, \quad \text{if } \alpha \geq 2.$$

So for  $\alpha \geq 2$ ,

$$\left(\frac{\underline{A}}{t}\right)^{1/\alpha} \int_0^\infty \frac{1}{1+u^\alpha} du \lesssim t^{-1/\alpha} \int_0^\infty \frac{1}{1+u^2} du = t^{-1/\alpha} [\tan^{-1}(u)|_0^\infty] = \frac{\pi}{2} t^{-1/\alpha},$$

implying  $\mathcal{N}_C(t) \lesssim t^{-1/\alpha}$ . For  $1 < \alpha < 2$ , we obtain

$$t^{-1/\alpha} \int_0^\infty \frac{1}{1+u^\alpha} du \leq t^{-1/\alpha} \sum_{k=0}^\infty \frac{1}{1+k^\alpha} \leq t^{-1/\alpha} \left(1 + \sum_{k=1}^\infty \frac{1}{k^\alpha}\right).$$

Since  $1 + \sum_{k=1}^\infty \frac{1}{k^\alpha}$  converges for  $\alpha > 1$ , we obtain  $\mathcal{N}_C(t) \lesssim t^{-1/\alpha}$ .  $\square$

**Proposition B.2.** *Suppose  $\underline{B}e^{-\tau i} \leq \lambda_i \leq \bar{B}e^{-\tau i}$  for  $\tau > 0$  and  $\underline{B}, \bar{B} \in (0, \infty)$ . Let  $\ell = \frac{1}{\tau} \log n^\theta$ ,  $\theta > 0$ . Then*

$$\mathcal{N}_C(t) \lesssim \log \left( \frac{1}{t} \right).$$

*Proof.* We have

$$\begin{aligned} \mathcal{N}_C(t) &= \text{tr}((C + tI)^{-1}C) = \sum_{i \geq 1} \frac{\lambda_i}{\lambda_i + t} \leq \frac{\bar{B}e^{-\tau i}}{\underline{B}e^{-\tau i} + t} = \frac{\bar{B}}{\underline{B}} \sum_{i \geq 1} \frac{1}{1 + t\underline{B}^{-1}e^{\tau i}} \\ &\lesssim \int_0^\infty \frac{1}{1 + t\underline{B}^{-1}e^{\tau x}} dx = \left[ x - \frac{1}{\tau} \log(t\underline{B}^{-1}e^{\tau x} + 1) \right] \Big|_0^\infty. \end{aligned}$$

Since

$$x - \frac{1}{\tau} \log(t\underline{B}^{-1}e^{\tau x} + 1) = \frac{1}{\tau} (\log(e^{\tau x}) - \log(t\underline{B}^{-1}e^{\tau x} + 1)) = \frac{1}{\tau} \log \left( t^{-1}\underline{B} \frac{e^{\tau x}}{e^{\tau x} + t^{-1}\underline{B}} \right),$$

evaluating

$$\frac{1}{\tau} \log \left( t^{-1}\underline{B} \frac{e^{\tau x}}{e^{\tau x} + t^{-1}\underline{B}} \right) \Big|_0^\infty$$

yields the result. □
